# Supplementary material
Source: PubMed Central journal article supplement (PMC4743686)
Supplement: supp_ddv503_ddv503supp.pdf [file supp_ddv503_ddv503supp.pdf]

| Strain                            | YPD  | YPGal | YPGE | SCD  | SCGal | SCG  |
|-----------------------------------|------|-------|------|------|-------|------|
| BY4741 WT                         | ++++ | ++++  | ++++ | ++++ | ++++  | ++++ |
| BY4742 <i>coa6</i> Δ              | ++++ | ++++  | ++++ | ++++ | ++++  | ++++ |
| BY4741 <i>cox11</i> Δ             | ++++ | ++++  | -    | ++++ | ++    | -    |
| STY2 <i>coa6</i> Δ <i>cox11</i> Δ | ++++ | ++++  | -    | ++++ | ++    | -    |
| BY4741 <i>cox12</i> Δ             | ++++ | ++++  | -    | ++++ | +++   | -    |
| STY3 <i>coa6</i> Δ <i>cox12</i> Δ | ++++ | ++++  | -    | ++++ | ++    | -    |
| BY4741 <i>cox17</i> Δ             | ++++ | ++++  | -    | ++++ | -     | -    |
| STY1 <i>coa6</i> Δ <i>cox17</i> Δ | ++++ | ++++  | -    | ++++ | -     | -    |
| BY4741 <i>cox19</i> Δ             | ++++ | +++   | -    | ++++ | ++    | -    |
| STY4 <i>coa6</i> Δ <i>cox19</i> Δ | ++++ | +++   | -    | ++++ | ++    | -    |
| BY4741 <i>cox23</i> Δ             | ++++ | +++   | -    | ++++ | ++    | -    |
| STY5 <i>coa6</i> Δ <i>cox23</i> Δ | ++++ | +++   | -    | ++++ | ++    | -    |
| BY4741 <i>cmc1</i> Δ              | ++++ | ++++  | ++++ | ++++ | ++++  | ++   |
| STY6 <i>coa6</i> Δ <i>cmc1</i> Δ  | ++++ | ++++  | ++++ | ++++ | ++++  | ++++ |
| BY4741 <i>sco1</i> Δ              | ++++ | +++   | -    | ++++ | ++    | -    |
| STY9 <i>coa6</i> Δ <i>sco1</i> Δ  | ++++ | +++   | -    | ++++ | ++    | -    |
| BY4741 <i>sco2</i> Δ              | ++++ | ++++  | ++++ | ++++ | ++++  | ++++ |
| STY10 <i>coa6</i> Δ <i>sco2</i> Δ | ++++ | ++++  | -    | ++++ | ++++  | ++   |
| BY4741 <i>pic2</i> Δ              | ++++ | ++++  | ++++ | ++++ | ++++  | ++++ |
| STY11 <i>coa6</i> Δ <i>pic2</i> Δ | ++++ | ++++  | +++  | ++++ | ++++  | +++  |

**Supplementary Table 1.** Genetic interaction study of Coa6 with known CcO assembly factors involved in copper metabolism. Serial dilutions of wild type (WT), single knockouts, and double knockouts were spotted on rich (YP) or synthetic complete (SC) media with different carbon sources as indicated and incubated at 30°C for 2-5 days. The plates were scored according to the number of dilutions that grew. Maximal growth of all four dilutions is indicated using “++++,” while no growth is indicated by “-”.

| Strain                           | Genotype                                                                                                                             | Source          |
|----------------------------------|--------------------------------------------------------------------------------------------------------------------------------------|-----------------|
| BY4741 WT                        | MAT a, <i>his3Δ1</i> , <i>leu2Δ0</i> , <i>met15Δ0</i> , <i>ura3Δ0</i>                                                                | Greenberg lab   |
| BY4742 WT                        | MAT α, <i>his3Δ1</i> , <i>leu2Δ0</i> , <i>lys2Δ0</i> , <i>ura3Δ0</i>                                                                 | Greenberg lab   |
| BY4742 <i>coa6Δ</i>              | MAT α, <i>his3Δ1</i> , <i>leu2Δ0</i> , <i>lys2Δ0</i> , <i>ura3Δ0</i> , <i>coa6Δ::NatMX4</i>                                          | This study      |
| BY4741 <i>COA6<sup>HIA</sup></i> | MAT a, <i>his3Δ1</i> , <i>leu2Δ0</i> , <i>met15Δ0</i> , <i>ura3Δ0</i>                                                                | This study      |
| BY4741 $\rho^0$                  | MAT a, <i>his3Δ1</i> , <i>leu2Δ0</i> , <i>met15Δ0</i> , <i>ura3Δ0</i>                                                                | This study      |
| BY4741 <i>coa6Δ</i>              | MAT a, <i>his3Δ1</i> , <i>leu2Δ0</i> , <i>met15Δ0</i> , <i>ura3Δ0</i> , <i>coa6Δ::KanMX4</i>                                         | Open Biosystems |
| BY4741 <i>sco1Δ</i>              | MAT a, <i>his3Δ1</i> , <i>leu2Δ0</i> , <i>met15Δ0</i> , <i>ura3Δ0</i> , <i>sco1Δ::KanMX4</i>                                         | Open Biosystems |
| BY4741 <i>sco2Δ</i>              | MAT a, <i>his3Δ1</i> , <i>leu2Δ0</i> , <i>met15Δ0</i> , <i>ura3Δ0</i> , <i>sco2Δ::KanMX4</i>                                         | Open Biosystems |
| BY4741 <i>cox11Δ</i>             | MAT a, <i>his3Δ1</i> , <i>leu2Δ0</i> , <i>met15Δ0</i> , <i>ura3Δ0</i> , <i>cox11Δ::KanMX4</i>                                        | Open Biosystems |
| BY4741 <i>cox12Δ</i>             | MAT a, <i>his3Δ1</i> , <i>leu2Δ0</i> , <i>met15Δ0</i> , <i>ura3Δ0</i> , <i>cox12Δ::KanMX4</i>                                        | Open Biosystems |
| BY4741 <i>cox17Δ</i>             | MAT a, <i>his3Δ1</i> , <i>leu2Δ0</i> , <i>met15Δ0</i> , <i>ura3Δ0</i> , <i>cox17Δ::HphMX4</i>                                        | This study      |
| BY4741 <i>cox19Δ</i>             | MAT a, <i>his3Δ1</i> , <i>leu2Δ0</i> , <i>met15Δ0</i> , <i>ura3Δ0</i> , <i>cox19Δ::KanMX4</i>                                        | Open Biosystems |
| BY4741 <i>cox23Δ</i>             | MAT a, <i>his3Δ1</i> , <i>leu2Δ0</i> , <i>met15Δ0</i> , <i>ura3Δ0</i> , <i>cox23Δ::KanMX4</i>                                        | Open Biosystems |
| BY4741 <i>cmc1Δ</i>              | MAT a, <i>his3Δ1</i> , <i>leu2Δ0</i> , <i>met15Δ0</i> , <i>ura3Δ0</i> , <i>cmc1Δ::KanMX4</i>                                         | Open Biosystems |
| BY4741 <i>cmc2Δ</i>              | MAT a, <i>his3Δ1</i> , <i>leu2Δ0</i> , <i>met15Δ0</i> , <i>ura3Δ0</i> , <i>cmc2Δ::KanMX4</i>                                         | Barrientos Lab  |
| BY4741 <i>pic2Δ</i>              | MAT a, <i>his3Δ1</i> , <i>leu2Δ0</i> , <i>met15Δ0</i> , <i>ura3Δ0</i> , <i>pic2Δ::KanMX4</i>                                         | This study      |
| STY9 <i>sco1Δcoa6Δ</i>           | MAT a, <i>his3Δ1</i> , <i>leu2Δ0</i> , <i>ura3Δ0</i> , <i>met15Δ0</i> , <i>sco1Δ::KanMX4</i> , <i>coa6Δ::clonNAT</i>                 | This study      |
| STY10 <i>sco2Δcoa6Δ</i>          | MAT a, <i>his3Δ1</i> , <i>leu2Δ0</i> , <i>ura3Δ0</i> , <i>lys2Δ0</i> , <i>sco2Δ::KanMX4</i> , <i>coa6Δ::NatMX4</i>                   | This study      |
| STY2 <i>cox11Δcoa6Δ</i>          | MAT a, <i>his3Δ1</i> , <i>leu2Δ0</i> , <i>ura3Δ0</i> , <i>cox11Δ::KanMX4</i> , <i>coa6Δ::NatMX4</i>                                  | This study      |
| STY3 <i>cox12Δcoa6Δ</i>          | MAT a, <i>his3Δ1</i> , <i>leu2Δ0</i> , <i>met15Δ0</i> , <i>ura3Δ0</i> , <i>lys2Δ0</i> , <i>cox12Δ::KanMX4</i> , <i>coa6Δ::NatMX4</i> | This study      |
| STY1 <i>cox17Δcoa6Δ</i>          | MAT a, <i>his3Δ1</i> , <i>leu2Δ0</i> , <i>ura3Δ0</i> , <i>lys2Δ0</i> , <i>met15Δ0</i> , <i>cox17Δ::HphMX4</i> , <i>coa6Δ::NatMX4</i> | This study      |
| STY4 <i>cox19Δcoa6Δ</i>          | MAT a, <i>his3Δ1</i> , <i>leu2Δ0</i> , <i>ura3Δ0</i> , <i>lys2Δ0</i> , <i>cox19Δ::KanMX4</i> , <i>coa6Δ::NatMX4</i>                  | This study      |
| STY5 <i>cox23Δcoa6Δ</i>          | MAT a, <i>his3Δ1</i> , <i>leu2Δ0</i> , <i>ura3Δ0</i> , <i>cox23Δ::KanMX4</i> , <i>coa6Δ::NatMX4</i>                                  | This study      |
| STY6 <i>cmc1Δcoa6Δ</i>           | MAT a, <i>his3Δ1</i> , <i>leu2Δ0</i> , <i>ura3Δ0</i> , <i>lys2Δ0</i> , <i>cmc1Δ::KanMX4</i> , <i>coa6Δ::NatMX4</i>                   | This study      |
| STY11 <i>pic2Δcoa6Δ</i>          | MAT a, <i>his3Δ1</i> , <i>leu2Δ0</i> , <i>ura3Δ0</i> , <i>met15Δ0</i> , <i>pic2Δ::KanMX4</i> , <i>coa6Δ::NatMX4</i>                  | This study      |

**Supplementary Table 2.** Yeast strains used in this study.

| Name                                     | Sequence (5' → 3')                                                   |
|------------------------------------------|----------------------------------------------------------------------|
| <b>Cloning in pRS416</b>                 |                                                                      |
| <i>SacI</i> yCOA6+500bp upstream Forward | ccctgg <b>GAGCTC</b> gcaaagacgcgcagccaaaaagccgaacagtta               |
| <i>Bam</i> HI yCOA6 Reverse              | gggact <b>GGATCC</b> tactgatttcgctccctctgttagcttctgctcgat            |
| <i>Xho</i> I 500bp upstream Reverse      | ccctaa <b>CTCGAG</b> cgctatattactactattccttc                         |
| <i>Xho</i> I hCOA6 Forward               | cccggc <b>CTCGAG</b> atgggtccagggtggtccattattgtc                     |
| <i>Xho</i> I HyCOA6 Forward              | cccggc <b>CTCGAG</b> atgggttgttctctttcgacgg                          |
| <i>Bam</i> HI h/HyCOA6 Reverse           | cccatt <b>GGATCC</b> caggacttagcagtagtttcag                          |
| <b>Cloning in pAG423GPD</b>              |                                                                      |
| AttB1 yCOA6 Forward                      | GGGGACAAGTTTGTACAAAAAAGCAGGCTTCatgggctattttcatttgatgggtggc           |
| AttB2 yCOA6 Reverse                      | GGGGACCACTTTGTACAAGAAAGCTGGGTCcgtatttcgctccctctgttagc                |
| <b>Cloning in pYM14 chromosomal</b>      |                                                                      |
| <b>HA tag</b>                            |                                                                      |
| S3 yCOA6 Forward                         | aagagaatcgagcaggaagctaacagaggggaacgaaatcag <b>CGTACGCTGCAGGTCGAC</b> |
| S2 yCOA6 Reverse                         | atatatatgtaatatgagccaataactcactaaaaactca <b>ATCGATGAATTCGAGCTCG</b>  |
| <b>Site Directed mutagenesis primers</b> |                                                                      |
| yCOA6 W26C Forward                       | agaaagttgtgctgagtgccagggacgc                                         |
| yCOA6 W26C Reverse                       | gcgccctggactcgagcacaactttct                                          |
| yCOA6 C68A Forward                       | gtggaaaatgaaaatttgaggagaatgccgccatagctgga                            |
| yCOA6 C68A Reverse                       | tccagctatgggctgattctcctcaaattttcattttccac                            |
| yCOA6 C25A Forward                       | gttcacagagaaagttggcctgggagtgccagggacg                                |
| yCOA6 C25A Reverse                       | cgctccctggactcccaggccaactttctctgtgaac                                |
| ySCO2 E161K Forward                      | taatctgtcaagctttctggacaaatgtcggggc                                   |
| ySCO2 E161K Reverse                      | gccccgacattgtccagaaaagcttgacagatta                                   |
| ySCO2 S246F Forward                      | gggtcgatcaaatagaaaaatgaaatggccactaagtaaatcctgg                       |
| ySCO2 S246F Reverse                      | ccaggattacttagtgaccatttcattttctattgatcgacct                          |

**Supplementary Table 3.** Primers used in this study.

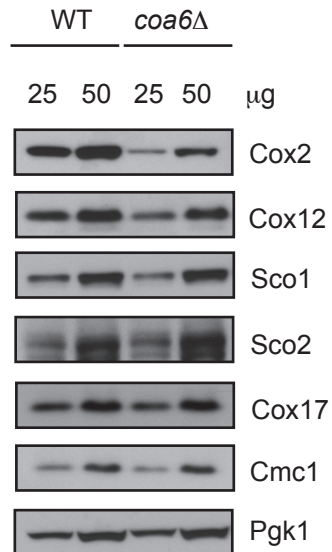

**Supplementary Figure 1. Levels of CcO assembly factors do not change in *coa6Δ* cells.**

Western blot analysis of the indicated CcO subunits and assembly factors in total cellular protein extract from WT and *coa6Δ* cells grown to mid-logarithmic growth phase in YPGal medium. The blot was probed with the indicated antibodies. Pgk1 was used as a loading control.

**A**

```

hCOX6B -----MAED-METKIKNYK-TAPFDSRFPNQN-QTRNCW 31
yCOX12 -----MADQ-ENSPLH-----TVGFDARFPQQN-QTKHCW 28
hCOA6      MGGPGPLLSPSRGFLLCKTGWHSNRLLGDCGPHTPVSTALSFIAVGMAAPSMK-ERQVCW 59
yCOA6      -----MGLFSFDGGKK-----ESQPPNTRSQRKLCW 26

hCOX6B      QNYLDFHRCQKAM-----TAKGGDIS-VCEWYQRVYQSLQPTSMWTDWDEQR----- 77
yCOX12      QSYVDYHKCVN-----MKGEDFA-PCKVFWKTYNALCPLDWIEKWDDOR----- 71
hCOA6      GARDEYWKCLD-----ENLEDAS-QCKLRSSFESSCPQQWIKYFDKRRDYLFK 108
yCOA6      ESRDAFFQCLDKADILDAMPKNSKSIKSHCKVENEKFEENC AHSWIKYFKEKR-VIDFK 85

hCOX6B      ---AEGTF-PGKI----- 86
yCOX12      ---EKGIF-AGDINSD--- 83
hCOA6      EKFEAGQFEPSETTAKS-- 125
yCOA6      REQTIKRIEQAQQRERNQ 104

```

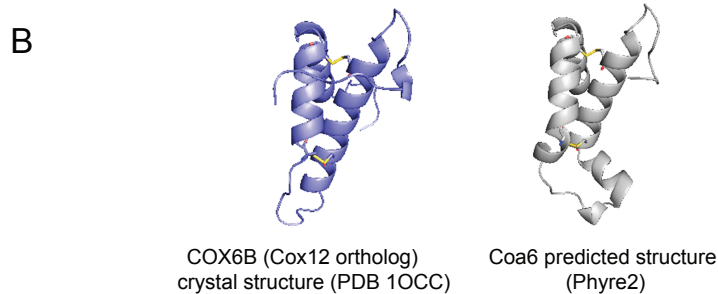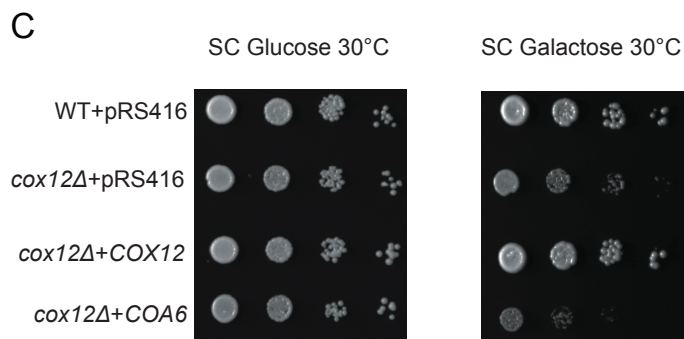

**Supplementary Figure 2. Coa6 and Cox12 exhibit sequence and structural similarity but Coa6 overexpression retards *cox12Δ* growth.**

(A) Sequence alignment of human COX6B, yeast Cox12, human COA6, and yeast Coa6 proteins performed using ClustalW. (B) The yeast Coa6 structure predicted on the basis of the bovine COX6B structure (Protein Data Bank ID 1OCC) using Phyre2 software and was visualized using PyMol. (C) WT and *cox12Δ* cells were transformed with empty vector, pRS416-COX12, or pRS416-COA6 and spotted on SC Galactose plates. Cells were grown at 30°C and images were taken after 3 days.
